# Supplementary material for: The Associations of HLA-A*02:01 and DRB1*11:01 with Hepatitis C Virus Spontaneous Clearance Are Independent of IL28B in the Chinese Population
Source: PubMed Central journal article supplement (PMC4980596; doi:10.1038/srep31485), 2016-08-11
Supplement: srep31485-s1.pdf [file srep31485-s1.pdf]

**The Associations of HLA-A\*02:01 and DRB1\*11:01 with  
Hepatitis C Virus Spontaneous Clearance Are Independent  
of *IL28B* in the Chinese Population**

Jieting Huang<sup>1,2\*</sup>, Ke Huang<sup>1,2\*</sup>, Ru Xu<sup>1,2\*</sup>, Min Wang<sup>1,2</sup>, Qiao Liao<sup>1,2</sup>, Huaping Xiong<sup>1,2</sup>,

Chengyao Li<sup>3</sup>, Xi Tang<sup>3</sup>, Zhengang Shan<sup>1,2</sup>, Ming Zhang<sup>4</sup>, Xia Rong<sup>1,2</sup>, Kenrad Nelson<sup>5</sup>,

Yongshui Fu<sup>1,2</sup>

Table S1. Clearance rate of the study population

| Gender | Spontaneous clearance | Persistent infection | Clearance rate (%) | <i>P</i> (male/female) | OR (95% C.I.)        |
|--------|-----------------------|----------------------|--------------------|------------------------|----------------------|
| Male   | 152                   | 1046                 | 12.7               | 2.03E-9                | 0.397 (0.292, 0.541) |
| Female | 79                    | 216                  | 26.8               |                        |                      |
| Total  | 231                   | 1262                 | 15.5               |                        |                      |

Table S2. Subjects with available HLA genotyping results

| HLA  | Spontaneous clearance | Persistent infection |
|------|-----------------------|----------------------|
| A    | 231                   | 429                  |
| B    | 231                   | 429                  |
| C    | 230                   | 427                  |
| DPB1 | 227                   | 427                  |
| DQB1 | 230                   | 429                  |
| DRB1 | 231                   | 429                  |

Table S3. Association of *IL28B* rs12979860 with HCV spontaneous clearance in Chinese population

| rs12979860 | Spontaneous clearance n (%) | Persistent infection n (%) | <i>P</i>    | OR (95% C.I.)        |
|------------|-----------------------------|----------------------------|-------------|----------------------|
| Allele     |                             |                            |             |                      |
| C          | 451 (97.6)                  | 784 (91.4)                 | 1.04E-5     | 3.870 (2.033, 7.368) |
| T          | 11 (2.4)                    | 74 (8.6)                   |             |                      |
| rs12979860 |                             |                            | CC vs CT+TT |                      |
| CC         | 221 (95.7)                  | 355 (82.8)                 | 2.03E-6     | 4.607 (2.331, 9.106) |
| CT         | 9 (3.9)                     | 74 (17.2)                  |             |                      |
| TT         | 1 (0.4)                     | 0 (0)                      |             |                      |

Table S4. The associations of HLA alleles with HCV spontaneous clearance stratified by their *IL28B* genotype

| HLA        | <i>IL28B</i> TT (n=575) |                       |          |                      | <i>IL28B</i> TG+GG (n=85) |                       |          |                       |
|------------|-------------------------|-----------------------|----------|----------------------|---------------------------|-----------------------|----------|-----------------------|
|            | Spontaneous             | Persistent            | <i>P</i> | OR (95% CI)          | Spontaneous               | Persistent            | <i>P</i> | OR (95% CI)           |
|            | clearance<br>(2n=442)   | infection<br>(2n=708) |          |                      | clearance<br>(2n=20)      | infection<br>(2n=150) |          |                       |
| A*02:01    | 47 (10.6)               | 47 (6.6)              | 0.016    | 1.673 (1.096, 2.555) | 0 (0)                     | 5 (3.3)               | 0.999    | -                     |
| DQB1*03:01 | 118 (26.8)              | 135 (19.1)            | 0.002    | 1.555 (1.173, 2.063) | 3 (15.0)                  | 32 (21.3)             | 0.769    | 0.651 (0.179, 2.359)  |
| DQB1*05:02 | 36 (8.2)                | 94 (13.3)             | 0.008    | 0.582 (0.389, 0.872) | 2 (10.0)                  | 19 (12.7)             | 0.999    | 0.766 (0.165, 3.567)  |
| DRB1*04:05 | 16 (3.6)                | 48 (6.8)              | 0.023    | 0.516 (0.290, 0.921) | 0 (0)                     | 4 (2.7)               | 0.999    | -                     |
| DRB1*11:01 | 42 (9.5)                | 38 (5.4)              | 0.007    | 1.851 (1.173, 2.921) | 2 (10.0)                  | 7 (4.7)               | 0.286    | 2.270 (0.438, 11.774) |
| DRB1*15:01 | 41 (9.3)                | 89 (12.6)             | 0.086    | 0.711 (0.481, 1.051) | 2 (10.0)                  | 18 (12.0)             | 0.999    | 0.815 (0.174, 3.807)  |

Table S5. Prediction of HCV spontaneous clearance

| Genotype   | Sensitivity | Specificity | Positive         | Negative         |
|------------|-------------|-------------|------------------|------------------|
|            |             |             | predictive value | predictive value |
| IL28B      | 22.9        | 90.7        | 57.0             | 68.6             |
| HLAs       | 26.0        | 95.1        | 55.8             | 70.5             |
| IL28B+HLAs | 28.1        | 88.9        | 57.8             | 69.7             |

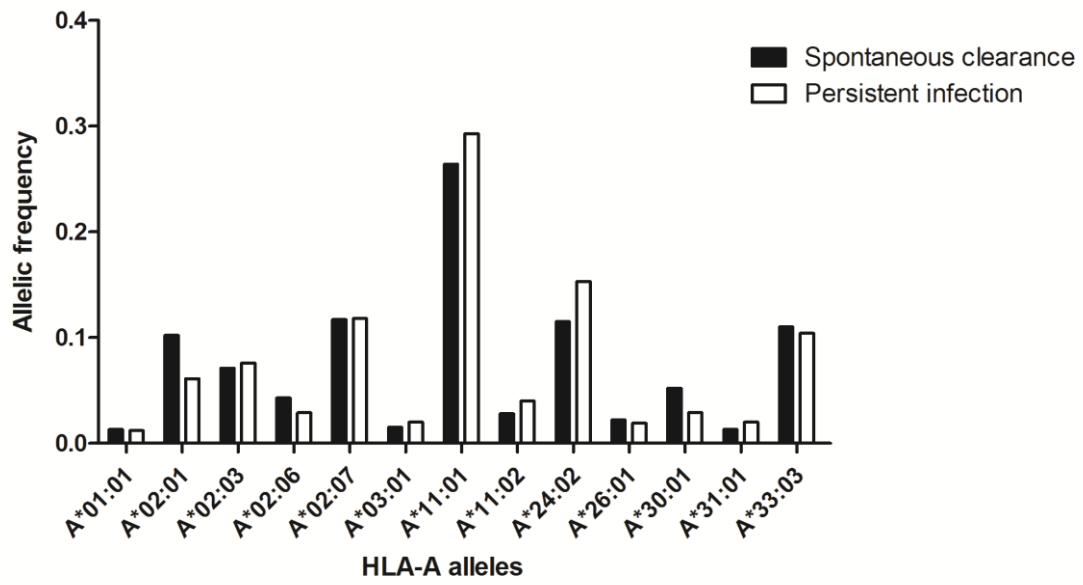

Figure S1. HLA-A diversity between the subjects with HCV clearance and persistent infection. Alleles with frequencies higher than 1.0% are shown.

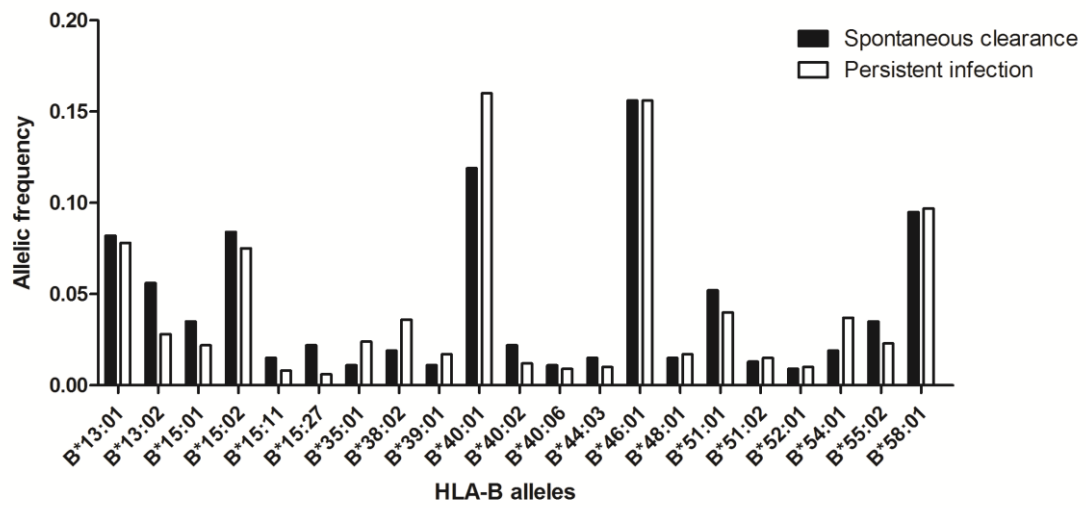

Figure S2. HLA-B diversity between the subjects with HCV clearance and persistent infection. Alleles with frequencies higher than 1.0% are shown.

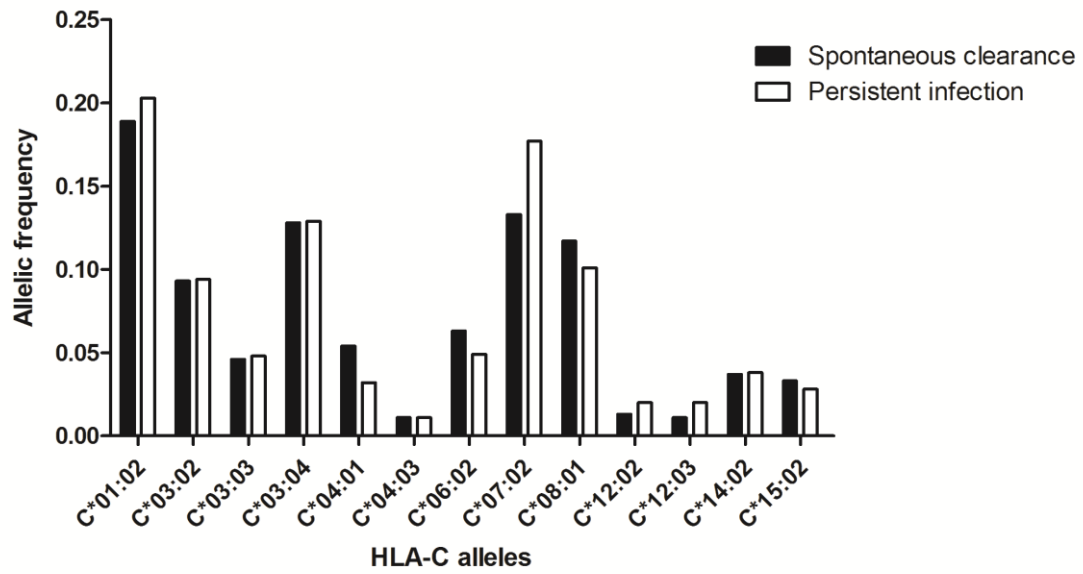

Figure S3. HLA-C diversity between the subjects with HCV clearance and persistent infection. Alleles with frequencies higher than 1.0% are shown.

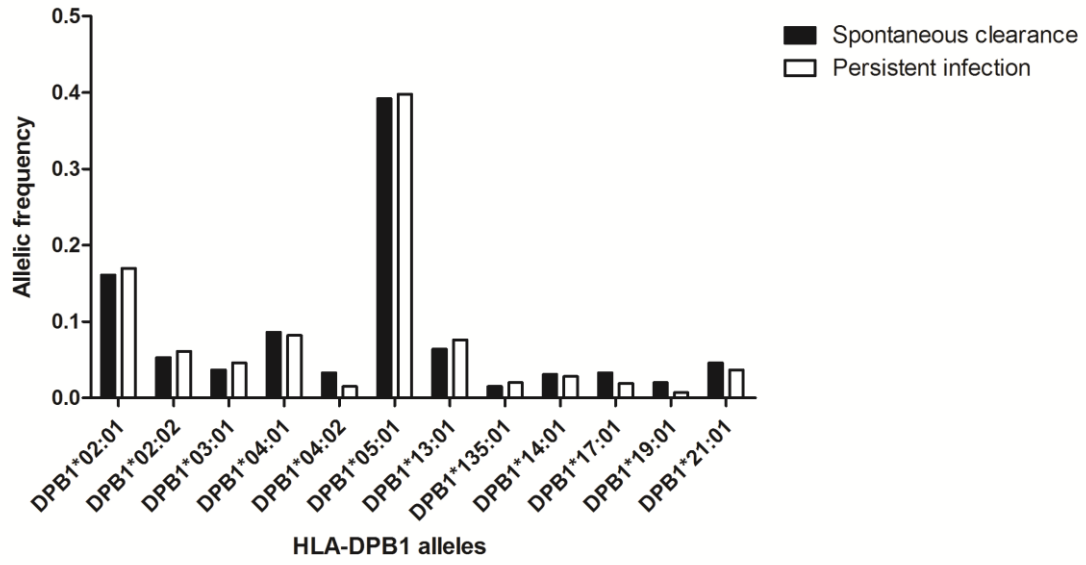

Figure S4. HLA-DPB1 diversity between the subjects with HCV clearance and persistent infection. Alleles with frequencies higher than 1.0% are shown.



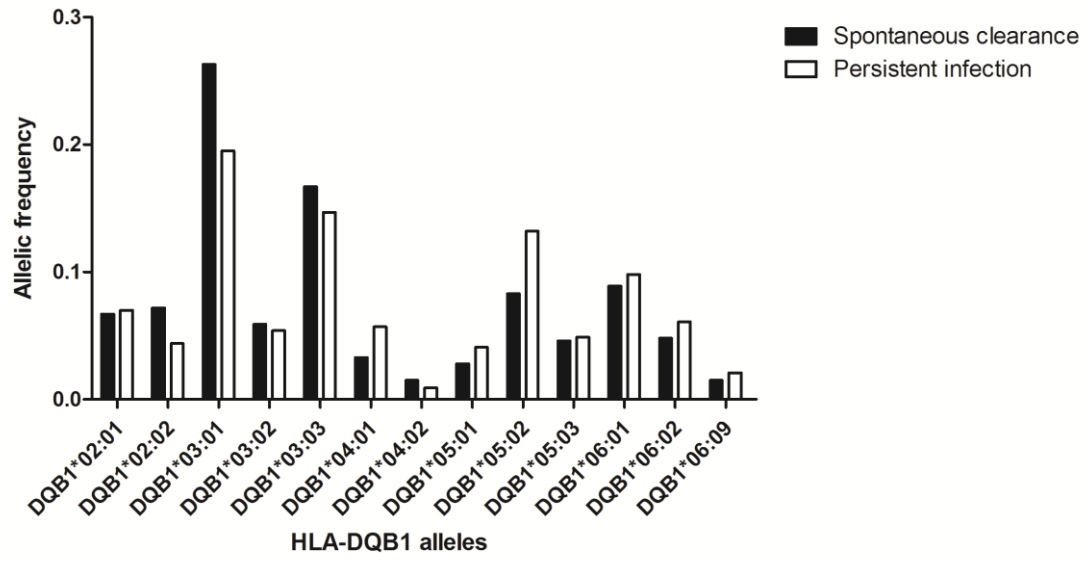

Figure S5. HLA-DQB1 diversity between the subjects with HCV clearance and persistent infection. Alleles with frequencies higher than 1.0% are shown.

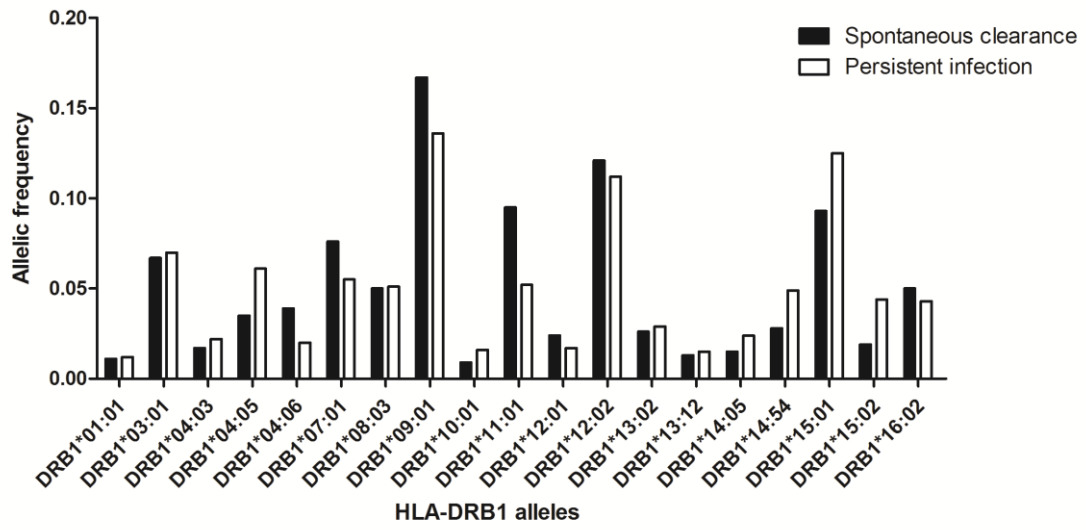

Figure S6. HLA-DRB1 diversity between the subjects with HCV clearance and persistent infection. Alleles with frequencies higher than 1.0% are shown.
